# Supplementary material
Source: Springer Nature journal article supplement (https://www.springermedizin.de/resource/supplementary/12943_2009_653_MOESM2_ESM.pdf/9554492)

**A**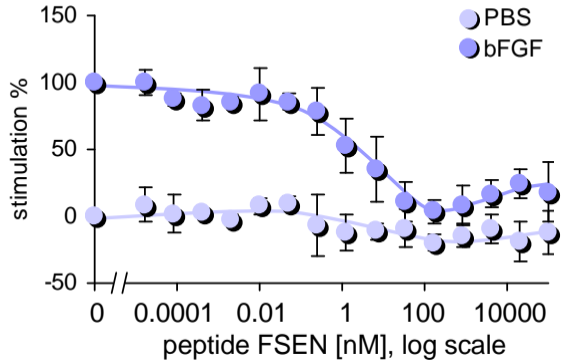**B**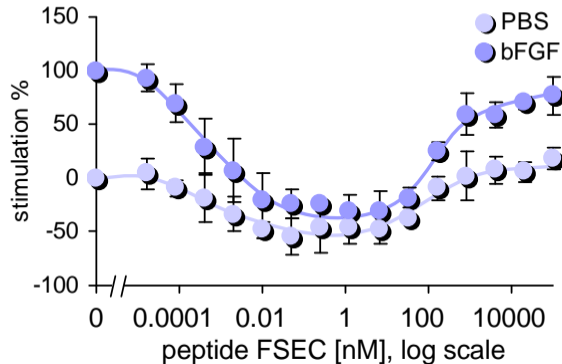

Supplement: MOESM2 [file 9554492]
